# Supplementary material
Source: PubMed Central journal article supplement (PMC3166618)
Supplement: NIHMS317579-supplement-01.pdf [file NIHMS317579-supplement-01.pdf]

## Table S1 List of signature genes (related to Figure 1)

### Common HF-SC signature genes (v.s. HF-TAC)

| Probe Set ID | Gene Symbol   | Gene Title                                                                                        | qHF-SC-1   |
|--------------|---------------|---------------------------------------------------------------------------------------------------|------------|
| 1429027_at   | 0610007N19Rik | RIKEN cDNA 0610007N19 gene, 0610007N19Rik                                                         | 131.192588 |
| 1435464_at   | 1110003E01Rik | RIKEN cDNA 1110003E01 gene, 1110003E01Rik                                                         | 459.023066 |
| 1454893_at   | 1110013L07Rik | RIKEN cDNA 1110013L07 gene, 1110013L07Rik                                                         | 198.069232 |
| 1455288_at   | 1110036O03Rik | RIKEN cDNA 1110036O03 gene, 1110036O03Rik                                                         | 704.177723 |
| 1436187_at   | 1110054M08Rik | RIKEN cDNA 1110054M08 gene, 1110054M08Rik                                                         | 166.205275 |
| 1431786_s_at | 1190003J15Rik | RIKEN cDNA 1190003J15 gene, 1190003J15Rik                                                         | 5292.9276  |
| 1452609_at   | 1190005I06Rik | RIKEN cDNA 1190005I06 gene, 1190005I06Rik                                                         | 292.853635 |
| 1456641_at   | 1190007F08Rik | RIKEN cDNA 1190007F08 gene, 1190007F08Rik                                                         | 226.478324 |
| 1429065_at   | 1200009F10Rik | RIKEN cDNA 1200009F10 gene, 1200009F10Rik                                                         | 168.096003 |
| 1428851_at   | 1300014I06Rik | RIKEN cDNA 1300014I06 gene, 1300014I06Rik                                                         | 1496.9648  |
| 1456603_at   | 1500005K14Rik | RIKEN cDNA 1500005K14 gene, 1500005K14Rik                                                         | 2579.9745  |
| 1426991_at   | 1810048J11Rik | RIKEN cDNA 1810048J11 gene, 1810048J11Rik                                                         | 155.594842 |
| 1442129_at   | 1810058I24Rik | RIKEN cDNA 1810058I24 gene, 1810058I24Rik                                                         | 256.375906 |
| 1430538_at   | 2210013O21Rik | RIKEN cDNA 2210013O21 gene, 2210013O21Rik                                                         | 892.359045 |
| 1424968_at   | 2210023G05Rik | RIKEN cDNA 2210023G05 gene, 2210023G05Rik                                                         | 177.623964 |
| 1428562_at   | 2210403K04Rik | RIKEN cDNA 2210403K04 gene, 2210403K04Rik                                                         | 452.547108 |
| 1453008_at   | 2300002D11Rik | RIKEN cDNA 2300002D11 gene, 2300002D11Rik                                                         | 761.795745 |
| 1428914_at   | 2310014D11Rik | RIKEN cDNA 2310014D11 gene, 2310014D11Rik                                                         | 1307.00465 |
| 1424099_at   | 2310016C16Rik | RIKEN cDNA 2310016C16 gene, 2310016C16Rik                                                         | 852.0807   |
| 1460344_at   | 2310033F14Rik | RIKEN cDNA 2310033F14 gene, 2310033F14Rik                                                         | 198.429585 |
| 1453184_at   | 2310040C09Rik | RIKEN cDNA 2310040C09 gene, 2310040C09Rik                                                         | 425.008452 |
| 1429505_at   | 2310076G13Rik | RIKEN cDNA 2310076G13 gene, 2310076G13Rik                                                         | 314.67289  |
| 1417779_at   | 2310079N02Rik | RIKEN cDNA 2310079N02 gene, 2310079N02Rik                                                         | 340.724779 |
| 1434581_at   | 2410066E13Rik | RIKEN cDNA 2410066E13 gene, 2410066E13Rik                                                         | 181.422105 |
| 1428097_at   | 2510009E07Rik | RIKEN cDNA 2510009E07 gene, 2510009E07Rik                                                         | 330.546377 |
| 1420465_s_at | 2610016E04Rik | major urinary protein 1 /// major urinary protein 2 /// RIKEN cDNA 2610016E04 gene, 2610016E04Rik | 116.874203 |
| 1454933_at   | 2610027C15Rik | RIKEN cDNA 2610027C15 gene, 2610027C15Rik                                                         | 290.360024 |
| 1425913_a_at | 2810022L02Rik | RIKEN cDNA 2810022L02 gene, 2810022L02Rik                                                         | 300.698015 |
| 1417218_at   | 2810048G17Rik | RIKEN cDNA 2810048G17 gene, 2810048G17Rik                                                         | 296.393408 |
| 1431424_at   | 2810055G20Rik | RIKEN cDNA 2810055G20 gene, 2810055G20Rik                                                         | 308.296116 |
| 1423679_at   | 2810432L12Rik | RIKEN cDNA 2810432L12 gene, 2810432L12Rik                                                         | 522.349612 |
| 1429089_s_at | 2900026A02Rik | RIKEN cDNA 2900026A02 gene, 2900026A02Rik                                                         | 816.282099 |
| 1435315_s_at | 2900034E22Rik | RIKEN cDNA 2900034E22 gene, 2900034E22Rik                                                         | 243.179956 |
| 1455091_at   | 3222402P14Rik | RIKEN cDNA 3222402P14 gene, 3222402P14Rik                                                         | 579.142694 |
| 1428540_at   | 3321401G04Rik | RIKEN cDNA 3321401G04 gene, 3321401G04Rik                                                         | 178.341631 |
| 1428861_at   | 4631422O05Rik | RIKEN cDNA 4631422O05 gene, 4631422O05Rik                                                         | 1644.72242 |
| 1460463_at   | 4632413I24Rik | RIKEN cDNA 4632413I24 gene, 4632413I24Rik                                                         | 858.687855 |
| 1416619_at   | 4632428N05Rik | RIKEN cDNA 4632428N05 gene, 4632428N05Rik                                                         | 372.613465 |
| 1434591_at   | 4732460K03Rik | RIKEN cDNA 4732460K03 gene, 4732460K03Rik                                                         | 107.45296  |
| 1455213_at   | 4930488E11Rik | RIKEN cDNA 4930488E11 gene /// thymosin beta-like, 4930488E11Rik                                  | 227.991398 |
| 1416607_at   | 4931406C07Rik | RIKEN cDNA 4931406C07 gene, 4931406C07Rik                                                         | 263.173    |
| 1447939_a_at | 4933409K07Rik | RIKEN cDNA 4933409K07 gene /// predicted gene, EG545                                              | 177.536114 |
| 1428663_at   | 5133401H06Rik | RIKEN cDNA 5133401H06 gene, 5133401H06Rik                                                         | 312.421655 |

Table S2 Histone marker occupancy (related to Figure 2)

| Cell type | ChIP-seq | total-peaks | promoter-peaks | target-genes | target-transcripts |
|-----------|----------|-------------|----------------|--------------|--------------------|
| ES        | H3K4me3  | 18294       | 12868          | 13597        | 16599              |
|           | H3K27me3 | 6101        | 3656           | 3048         | 3614               |
| MEF       | H3K4me3  | 16104       | 12342          | 12751        | 15667              |
|           | H3K27me3 | 6761        | 3123           | 2644         | 3114               |
| NPC       | H3K4me3  | 11620       | 10254          | 10046        | 12312              |
|           | H3K27me3 | 4773        | 1340           | 910          | 1059               |
| qHF-SC    | H3K4me3  | 10662       | 9643           | 10815        | 13255              |
|           | H3K79me2 | 23616       | 6654           | 6226         | 7806               |
|           | H3K27me3 | 6718        | 2076           | 1650         | 1959               |
| aHF-SC    | H3K4me3  | 10811       | 9819           | 10738        | 13117              |
|           | H3K79me2 | 25133       | 7658           | 7072         | 8840               |
|           | H3K27me3 | 8798        | 3071           | 2618         | 3135               |
| HF-TAC    | H3K4me3  | 9065        | 8534           | 9356         | 11345              |
|           | H3K79me2 | 23504       | 7650           | 7009         | 8750               |
|           | H3K27me3 | 8712        | 3369           | 2802         | 3372               |

**Table S3 List of ESC bivalent genes resolved to H3K27me3 in qHF-SCs (r**

| RefSeq ID    | Gene Name     | ESC   | qHF-SC |
|--------------|---------------|-------|--------|
| NM_001159638 | 0610012H03Rik | K4+27 | K27    |
| NM_029554    | 0610040J01Rik | K4+27 | K27    |
| NM_001163810 | 1700008P20Rik | K4+27 | K27    |
| NM_001085514 | 1700101E01Rik | K4+27 | K27    |
| NR_027899    | 1700109F18Rik | K4+27 | K27    |
| NM_001163145 | 1810041L15Rik | K4+27 | K27    |
| NR_027826    | 2610017I09Rik | K4+27 | K27    |
| NM_028277    | 2700045P11Rik | K4+27 | K27    |
| NM_001144992 | 2810459M11Rik | K4+27 | K27    |
| NR_015468    | 2900079G21Rik | K4+27 | K27    |
| NM_001145162 | 3110006E14Rik | K4+27 | K27    |
| NR_026733    | 3110039M20Rik | K4+27 | K27    |
| NM_177006    | 3110047P20Rik | K4+27 | K27    |
| NM_029008    | 4833403I15Rik | K4+27 | K27    |
| NM_029425    | 4833424O15Rik | K4+27 | K27    |
| NM_001081121 | 4931429I11Rik | K4+27 | K27    |
| NR_029437    | 4933406I18Rik | K4+27 | K27    |
| NM_198642    | 5031414D18Rik | K4+27 | K27    |
| NM_001032727 | 5730410E15Rik | K4+27 | K27    |
| NM_177854    | 6030405A18Rik | K4+27 | K27    |
| NM_001081227 | 6330403A02Rik | K4+27 | K27    |
| NM_001142965 | 6430704M03Rik | K4+27 | K27    |
| NR_029460    | 6530402F18Rik | K4+27 | K27    |
| NM_172419    | 9030612E09Rik | K4+27 | K27    |
| NR_030721    | 9130206I24Rik | K4+27 | K27    |
| NR_015562    | 9530036O11Rik | K4+27 | K27    |
| NR_015610    | 9530059O14Rik | K4+27 | K27    |
| NM_030728    | 9930013L23Rik | K4+27 | K27    |
| NR_027362    | A930003O13Rik | K4+27 | K27    |
| NM_172399    | A930038C07Rik | K4+27 | K27    |
| NM_007377    | Aatk          | K4+27 | K27    |
| NM_011510    | Abcc8         | K4+27 | K27    |
| NM_138955    | Abcg4         | K4+27 | K27    |
| NM_007424    | Acan          | K4+27 | K27    |
| NM_007384    | Accn1         | K4+27 | K27    |
| NM_009599    | Ache          | K4+27 | K27    |
| NM_007400    | Adam12        | K4+27 | K27    |
| NM_001024139 | Adamts15      | K4+27 | K27    |
| NM_172466    | Adamts18      | K4+27 | K27    |
| NM_175643    | Adamts2       | K4+27 | K27    |
| NM_001164785 | Adamts20      | K4+27 | K27    |
| NM_013906    | Adamts8       | K4+27 | K27    |
| NM_153534    | Adcy2         | K4+27 | K27    |
| NM_080435    | Adcy4         | K4+27 | K27    |

Table S4A Chromatin states of Transcription Factor families (related to Fig

**Sox family**

| RefSeq(s)    | Gene(s) | ESC   | NPC  | MEF   | HF-SC |
|--------------|---------|-------|------|-------|-------|
| NM_009233    | Sox1    | K4+27 | K4   | K27   | K27   |
| NM_011443    | Sox2    | K4    | K4   | K27   | K27   |
| NM_009237    | Sox3    | K4+27 | K4   | K27   | K27   |
| NM_009238    | Sox4    | K4+27 | K4   | K4    | K4+79 |
| NM_011444    | Sox5    | None  | K4   | K4    | None  |
| NM_001025560 | Sox6    | K4+27 | K4   | K4+27 | K27   |
| NM_011446    | Sox7    | K4+27 | None | K4+27 | K4    |
| NM_011447    | Sox8    | K4+27 | K4   | K4+27 | None  |
| NM_011448    | Sox9    | K4+27 | K4   | K4    | K4+79 |
| NM_011437    | Sox10   | K4+27 | None | K27   | K27   |
| NM_009234    | Sox11   | K4+27 | K4   | K4    | K27   |
| NM_011438    | Sox12   | K4    | K4   | K4    | K4    |
| NM_011439    | Sox13   | K4    | K4   | K4+27 | K4    |
| NM_011440    | Sox14   | K27   | K27  | K27   | K27   |
| NM_009235    | Sox15   | K4    | None | None  | None  |
| NM_011441    | Sox17   | K4+27 | K27  | K27   | K27   |
| NM_009236    | Sox18   | K4+27 | K27  | K27   | K27   |
| NM_177753    | Sox21   | K4+27 | K4   | K4+27 | K4+27 |
| NM_173384    | Sox30   | K4+27 | None | None  | None  |

**Lhx family**

| RefSeq(s)    | Gene(s) | ESC   | NPC   | MEF   | HF-SC |
|--------------|---------|-------|-------|-------|-------|
| NM_008498    | Lhx1    | K4+27 | K4    | K4+27 | K27   |
| NM_010710    | Lhx2    | K4+27 | K4    | K4+27 | K4+79 |
| NM_001039653 | Lhx3    | K27   | None  | K27   | K27   |
| NM_010712    | Lhx4    | K4+27 | K4+27 | K4+27 | K27   |
| NM_008499    | Lhx5    | K27   | K27   | K27   | K27   |
| NM_008500    | Lhx6    | K27   | K27   | K4+27 | K27   |
| NM_010713    | Lhx8    | K4+27 | K27   | K27   | K27   |
| NM_010714    | Lhx9    | K4+27 | None  | K4+27 | K27   |

**Neurod family**

| RefSeq(s) | Gene(s) | ESC | NPC | MEF | HF-SC |
|-----------|---------|-----|-----|-----|-------|
|-----------|---------|-----|-----|-----|-------|

Table S5 List of HF-SC signature genes PcG-repressed (gain of the H3K9me3)

| RefSeq ID     | Gene Name            | qHF-SC | HF-TAC | Genes highlighted |
|---------------|----------------------|--------|--------|-------------------|
| NM_025831     | <b>1300014I06Rik</b> | K4+79  | K27    |                   |
| NM_198649     | Ablim3               | K4+79  | K27    |                   |
| NM_009622     | <b>Adcy1</b>         | K4+79  | K27    |                   |
| NM_020332     | <b>Ank</b>           | K4+79  | K27    |                   |
| NM_016689     | Aqp3                 | K4+79  | K27    |                   |
| NM_001048142  | <b>Bdnf</b>          | K4+79  | K27    |                   |
| NM_027112     | Capns2               | K4+79  | K27    |                   |
| NM_0011111059 | <b>Cd34</b>          | K4+79  | K27    |                   |
| NM_009932     | <b>Col4a2</b>        | K4+79  | K27    |                   |
| NM_199473     | <b>Col8a2</b>        | K4+79  | K27    |                   |
| NM_010217     | Ctgf                 | K4+79  | K27    |                   |
| NM_009911     | <b>Cxcr4</b>         | K4+79  | K27    |                   |
| NM_007722     | Cxcr7                | K4+79  | K27    |                   |
| NM_010330     | Emb                  | K4+79  | K27    |                   |
| NM_172813     | <b>Enox1</b>         | K4+79  | K27    |                   |
| NM_201518     | <b>Flrt2</b>         | K4+79  | K27    |                   |
| NM_021458     | <b>Fzd3</b>          | K4+79  | K27    |                   |
| NM_008086     | <b>Gas1</b>          | K4+79  | K27    |                   |
| NM_145741     | <b>Gdf10</b>         | K4+79  | K27    |                   |
| NM_011824     | <b>Grem1</b>         | K4+79  | K27    |                   |
| NM_010437     | <b>Hivep2</b>        | K4+79  | K27    |                   |
| NM_001024720  | Hmcn1                | K4+79  | K27    |                   |
| NM_008393     | <b>Irx3</b>          | K4+79  | K27    |                   |
| NM_018826     | <b>Irx5</b>          | K4+79  | K27    |                   |
| NM_021359     | Itgb6                | K4+79  | K27    |                   |
| NR_027627     | <b>Kcnk2</b>         | K4+79  | K27    |                   |
| NM_001142731  | <b>Kctd1</b>         | K4+79  | K27    |                   |
| NM_008469     | Krt15                | K4+79  | K27    |                   |
| NM_010195     | <b>Lgr5</b>          | K4+79  | K27    |                   |
| NM_057173     | <b>Lmo1</b>          | K4+79  | K27    |                   |
| NM_022983     | <b>Lpar3</b>         | K4+79  | K27    |                   |
| NM_010733     | Lrrn3                | K4+79  | K27    |                   |
| NM_001081235  | <b>Mn1</b>           | K4+79  | K27    |                   |
| NM_001043355  | <b>Mtap6</b>         | K4+79  | K27    |                   |
| NM_008675     | <b>Nbl1</b>          | K4+79  | K27    |                   |
| NM_001164109  | <b>Nfatc1</b>        | K4+79  | K27    |                   |
| NM_001122953  | Nfia                 | K4+79  | K27    |                   |
| NM_001164034  | <b>Ntf3</b>          | K4+79  | K27    |                   |
| NM_001081009  | <b>Parp8</b>         | K4+79  | K27    |                   |
| NM_016798     | Pdlim3               | K4+79  | K27    |                   |
| NM_019809     | Pdlim5               | K4+79  | K27    |                   |
| NM_001164593  | <b>Pdzrn4</b>        | K4+79  | K27    |                   |
| NM_001164594  | Pdzrn4               | K4+79  | K27    |                   |
| NM_011218     | <b>Ptprs</b>         | K4+79  | K27    |                   |

**Table S6A List of HF-TAC signature genes induced in HF-TACs from HF-**

| RefSeq ID    | Gene Name     | qHF-SC | HF-TAC |
|--------------|---------------|--------|--------|
| NM_029639    | 1600029D21Rik | K4     | K4+79  |
| NM_197990    | 1700025G04Rik | K4     | K4+79  |
| NM_029368    | 1700029F09Rik | K4     | K4+79  |
| NM_001081085 | 2010317E24Rik | K4     | K4+79  |
| NM_001085493 | 2310030N02Rik | K4     | K4+79  |
| NM_028228    | 2610028A01Rik | K4     | K4+79  |
| NM_025642    | 2610039C10Rik | K4     | K4+79  |
| NM_025599    | 2610528E23Rik | K4     | K4+79  |
| NM_001037279 | 2700094K13Rik | K4     | K4+79  |
| NR_027866    | 5730408K05Rik | K4     | K4+79  |
| NM_153416    | Aaas          | K4     | K4+79  |
| NM_026179    | Abhd5         | K4     | K4+79  |
| NM_019673    | Actl6a        | K4     | K4+79  |
| NM_013464    | Ahr           | K4     | K4+79  |
| NM_009658    | Akr1b3        | K4     | K4+79  |
| NM_133237    | Apcdd1        | K4     | K4+79  |
| NM_027263    | Apitd1        | K4     | K4+79  |
| NM_181416    | Arhgap11a     | K4     | K4+79  |
| NM_027667    | Arhgap19      | K4     | K4+79  |
| NM_009791    | Aspm          | K4     | K4+79  |
| NM_011497    | Aurka         | K4     | K4+79  |
| NM_011496    | Aurkb         | K4     | K4+79  |
| NM_026505    | Bambi         | K4     | K4+79  |
| NM_013815    | Baz1a         | K4     | K4+79  |
| NM_054078    | Baz2a         | K4     | K4+79  |
| NM_201364    | BC055324      | K4     | K4+79  |
| NM_001122683 | Bdh1          | K4     | K4+79  |
| NM_001042527 | Blm           | K4     | K4+79  |
| NM_007557    | Bmp7          | K4     | K4+79  |
| NM_172578    | C79407        | K4     | K4+79  |
| NM_026613    | Ccdc34        | K4     | K4+79  |
| NM_027411    | Ccdc99        | K4     | K4+79  |
| NM_009828    | Ccna2         | K4     | K4+79  |
| NM_009829    | Ccnd2         | K4     | K4+79  |
| NM_007634    | Ccnf          | K4     | K4+79  |
| NM_009862    | Cdc45l        | K4     | K4+79  |
| NM_001025779 | Cdc6          | K4     | K4+79  |
| NM_013538    | Cdca3         | K4     | K4+79  |
| NM_026560    | Cdca8         | K4     | K4+79  |
| NM_007669    | Cdkn1a        | K4     | K4+79  |
| NM_026014    | Cdt1          | K4     | K4+79  |
| NM_007681    | Cenpa         | K4     | K4+79  |
| NM_173762    | Cenpe         | K4     | K4+79  |
| NM_021886    | Cenph         | K4     | K4+79  |

**Table S7A List of HF-SC signature genes PcG-repressed in aHF-SCs and active**

| RefSeq ID    | Gene Name | qHF-SC | aHF-SC |
|--------------|-----------|--------|--------|
| NM_001048142 | Bdnf      | K4+79  | K27    |
| NM_001164593 | Pdzrn4    | K4+79  | K27    |
| NM_001164034 | Ntf3      | K4+79  | K27    |
| NM_009622    | Adcy1     | K4+79  | K4+27  |
| NM_145741    | Gdf10     | K4+79  | K4+27  |
| NM_011824    | Grem1     | K4+79  | K4+27  |
| NM_001142731 | Kctd1     | K4+79  | K4+27  |
| NM_001164109 | Nfatc1    | K4+79  | K4+27  |
| NM_010455    | Hoxa7     | K4+79  | K4+27  |
| NM_001122758 | Pcdh7     | K4+79  | K4+27  |
| NM_007467    | Aplp1     | K4     | K27    |
| NM_053199    | Cadm3     | K4     | K27    |
| NM_008005    | Fgf18     | K4     | K27    |
| NM_001038613 | Olfm1     | K4     | K27    |
| NM_001083809 | Slc43a1   | K4     | K27    |
| NM_010484    | Slc6a4    | K4     | K27    |
| NM_178395    | Zdhhc2    | K4     | K27    |
| NM_019707    | Cdh13     | K4     | K27    |
| NM_019971    | Pdgfc     | K4     | K27    |
| NM_001162941 | Mapre2    | K4     | K27    |
| NM_001038612 | Olfm1     | K4     | K27    |
| NM_025451    | Camk2n1   | K4     | K4+27  |
| NM_009793    | Camk4     | K4     | K4+27  |
| NM_010279    | Gfra1     | K4     | K4+27  |
| NM_008115    | Gfra2     | K4     | K4+27  |
| NM_013589    | Ltbp2     | K4     | K4+27  |
| NM_019867    | Ngef      | K4     | K4+27  |
| NM_001081147 | Oxtr      | K4     | K4+27  |
| NM_148950    | Pknox2    | K4     | K4+27  |
| NM_027241    | Polr3gl   | K4     | K4+27  |
| NM_008858    | Prkd1     | K4     | K4+27  |
| NM_007706    | Socs2     | K4     | K4+27  |
| NM_177708    | Rtn4rl1   | K4     | K4+27  |
| NM_028804    | Ccdc3     | K4     | K4+27  |
| NM_018827    | Crlf1     | K4     | K4+27  |
| NM_028627    | Psd       | K4     | K4+27  |
| NM_198967    | Tmtc1     | K4     | K4+27  |
| NM_013602    | Mt1       | K4     | K4+27  |

## I. Supplemental Figures

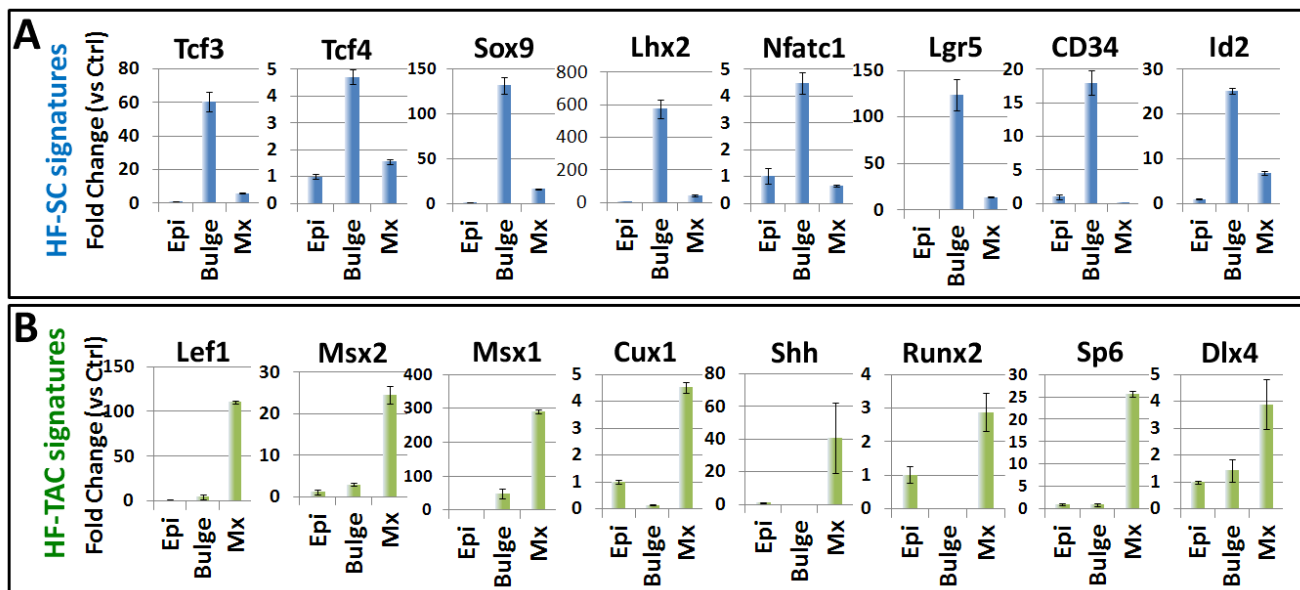

**Figure S1. Confirmation of Key HF-SC and HF-TAC Signature Genes (Related to Figure 1).**

mRNAs were isolated from FACS-purified interfollicular epidermal cells (Epi), activated HF-SCs (Bulge) and matrix HF-TACs (Mx) and analyzed by real-time RT-PCRs to test the validity of our microarray data. We focused on well-established HF-SC (**A**) and HF-TAC (**B**) genes for our analyses. Fold changes were normalized to Epi mRNA (Epi=1), except for *Cd34*, *Shh*, *Runx2* and *Dlx4*, whose Epi value was zero, and hence were normalized to total epidermal basal cells (Epi+HF). Data are reported as average  $\pm$  SD. n=3.



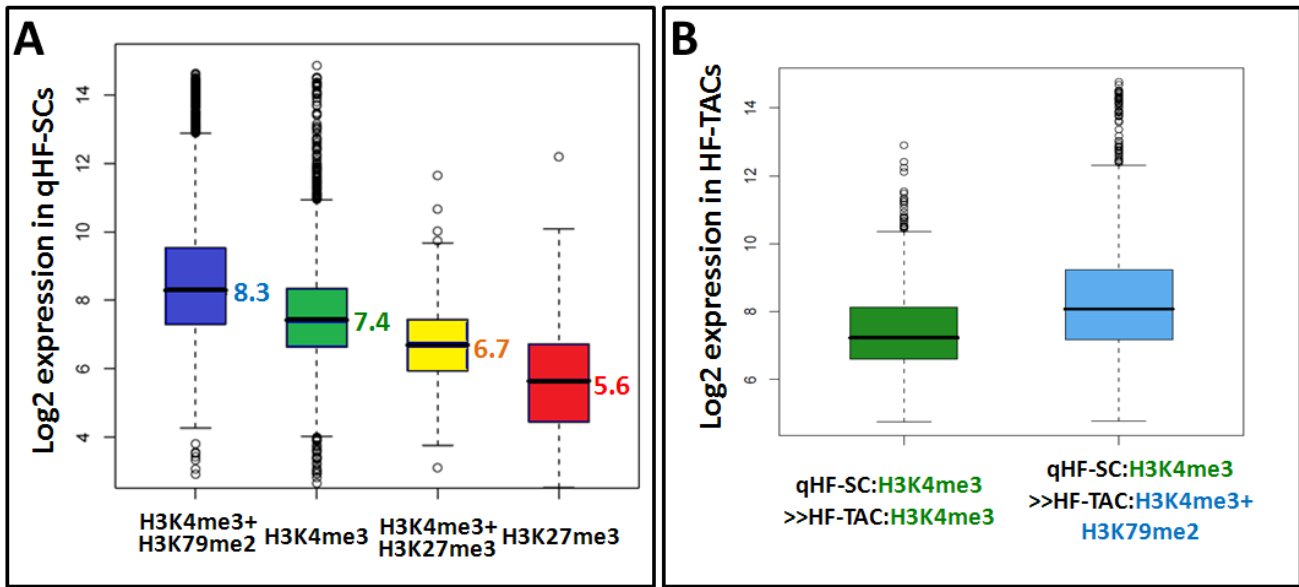

**Figure S2. Comparative Analyses of Genes for Histone Modification Status and Gene Expression Levels (Related to Figure 4).**

**(A)** The expression levels of genes marked by both H3K4me3 and H3K79me2 (primed and transcribed) are higher than those marked only by H3K4me3 (primed). mRNA expression levels in qHF-SCs are presented as Log<sub>2</sub> expression, with the means listed (8.3 vs 7.4,  $p < 0.001$ ). Very few genes existed in a bivalent (poised) state (H3K4me3+H3K27me3) and these showed signs of higher expression than genes marked only by H3K27me3 (mean log<sub>2</sub>=6.7 vs 5.6,  $p < 0.001$ ). **(B)** The expression levels of HF-SC genes which gain the H3K79me2 mark in HF-TACs are greater than those displaying the single H3K4me3 mark in both populations. Log<sub>2</sub> of mRNA expression levels are shown ( $p < 0.001$ ). Color coding is according to the system used in the main text.

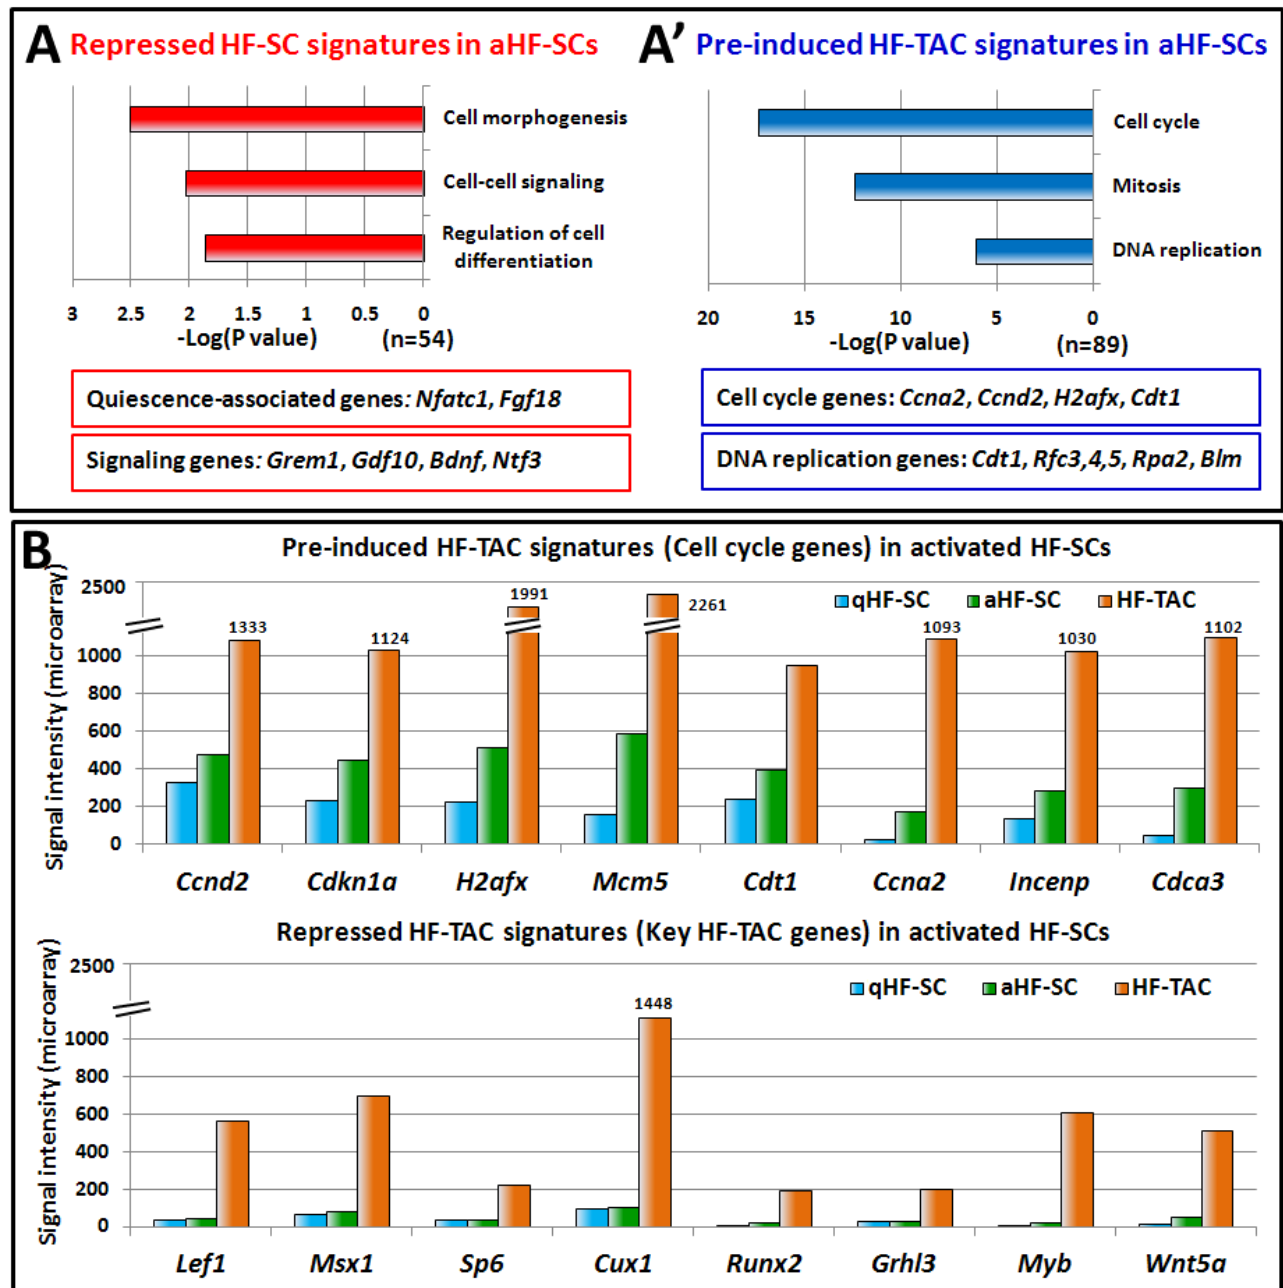

**Figure S3. Cell Cycle Genes Are Pre-induced While Key HF-TAC Genes Remain Silenced in aHF-SCs (Related to Figure 6).**

(A) Gene ontology analysis and representative examples of repressed HF-SC signatures (left) and pre-induced HF-TAC signatures (right) in aHF-SCs. Note that a small number of HF-SC signature genes become PcG-repressed and that some cell cycle genes (more highly expressed in HF-TACs), become pre-induced in aHF-SCs. (B) Signal intensities of HF-TAC mRNAs whose genes either become pre-induced (top) or retain repression (bottom) during the transition from HF-SC quiescence

to activation. Note that pre-induced cell cycle genes in aHF-SCs are primed and transcribed by ~2X, although their levels are considerably higher in HF-TACs. By contrast, genes that are PcG-repressed display much tighter control, remaining silent in both quiescent and activated HF-SCs. Notably, many of these PcG-repressed genes in HF-SCs are known to play a role in hair lineage determination and differentiation.

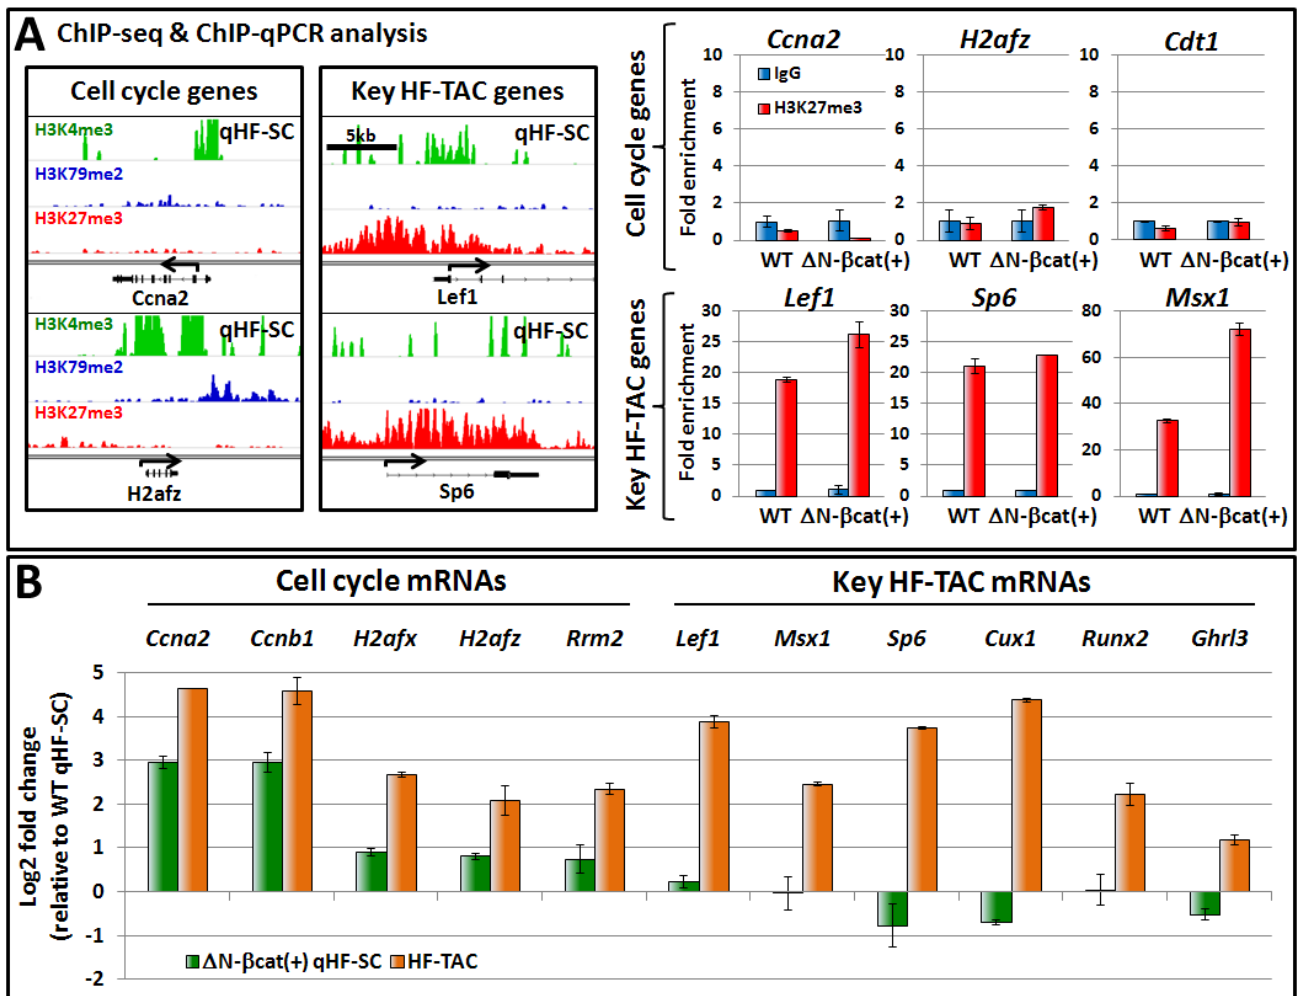

**Figure S4. Elevated  $\beta$ -catenin in Quiescent HF-SCs Is Not Sufficient to Relieve PcG-mediated Repression of Key HF-TAC Genes (Related to Figure 6).**

(A) Comparative analysis of chromatin status for HF-TAC genes in WT and  $\Delta N$ - $\beta$ cat(+) qHF-SCs. (left) ChIP-seq signal tracks reveal the activation/repression status of non-PcG-regulated cell cycle and PcG-regulated HF-TAC genes in WT qHF-SCs. (right) ChIP-qPCR analysis reveal the H3K27me3 status of the same genes in WT and in  $\Delta N$ - $\beta$ act(+) qHF-SCs. IgG Abs were used as a non-specific IP control. ChIP signals were normalized against a *Gapdh*-promoter ChIP (input vs IP). Note that PcG-repressed key HF-TAC regulators were not relieved from PcG-mediated repression by sustained  $\beta$ -catenin signaling in qHF-SCs. (B) RT-PCR to measure relative levels (log<sub>2</sub>) of HF-TAC signature mRNAs contrasted with  $\Delta N$ - $\beta$ act(+) qHF-SCs or matrix HF-TACs vs WT qHF-SCs. Note that

although non-PcG regulated cell cycle genes are much more highly expressed in  $\Delta N$ - $\beta$ act(+) than WT qHF-SCs, this is not the case for PcG-repressed HF-TAC genes.

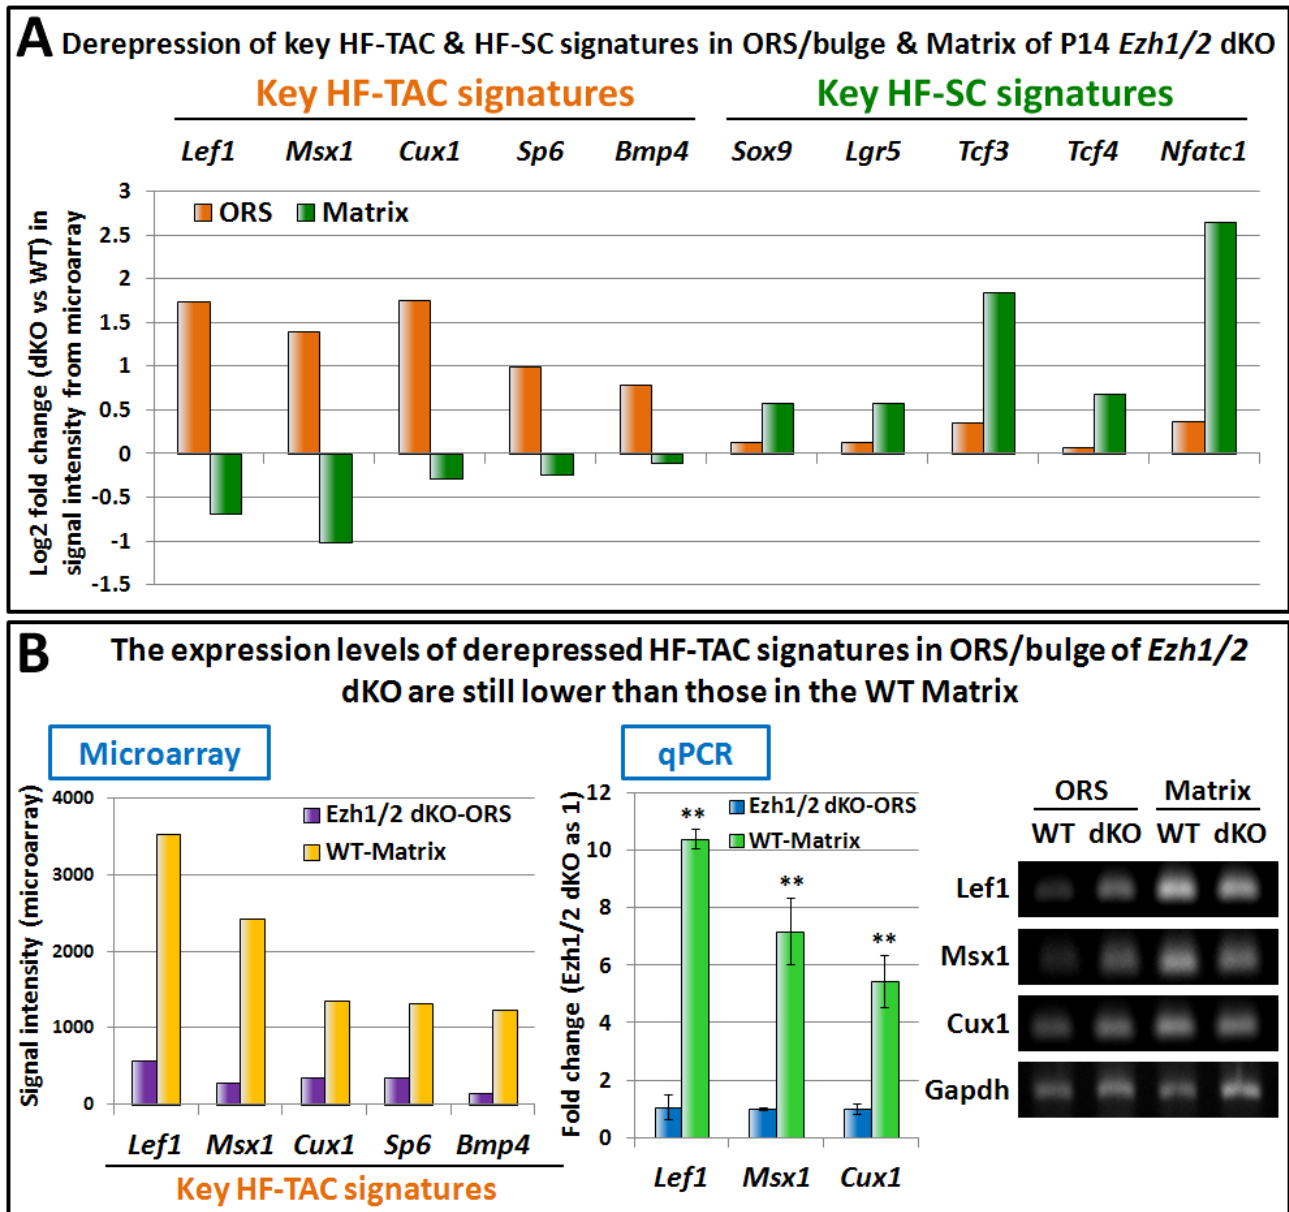

**Figure S5. PcG-Regulated Signature Genes Are Ectopically Activated in *Ezh1/2* dKO HF Populations, but Their Levels Are Markedly Lower than Their Normal Activation Levels in the Lineage (Related to Figure 6).**

(A) Log2 of fold changes (*Ezh1/2* dKO vs WT) in microarray signal intensities of the key HF-TAC and HF-SC signature mRNAs from ORS/bulge and matrix cells in P14 wild-type (WT) and *Ezh1/2* dKO (dKO) engrafted skins. Note that in the absence of EZH1/2, key HF-TAC genes were precociously activated in ORS/bulge, and conversely, key HF-SC signature genes sustained expression later in the lineage than normal. (B) The precocious expression of key HF-TAC signature genes in *Ezh1/2* dKO

ORS/bulge cells was significantly lower than in the WT matrix, where these genes are normally activated. Microarray intensities of key HF-TAC signature mRNAs in *Ezh1/2* dKO ORS/bulge and WT matrix (**left**). Fold changes (*Ezh1/2* dKO vs WT) in mRNA expression were analyzed by RT-qPCR. Quantifications are shown (**middle**) along with the gel images of amplified cDNA (**right**). Expression levels were normalized against Gapdh mRNA, and fold changes are presented as *Ezh1/2* dKO-ORS mRNA equal to 1. Data are reported as average  $\pm$  SD. n=3. \*\*, p<0.01.

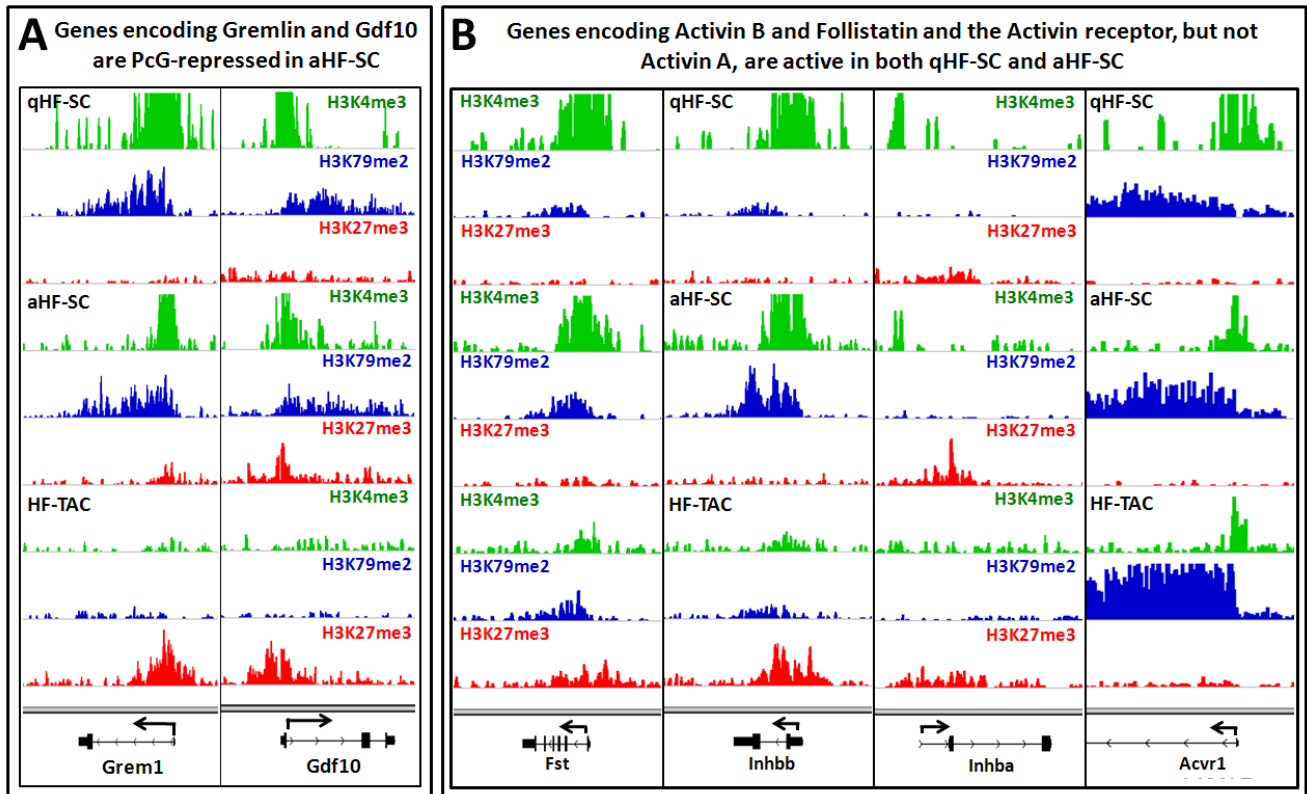

**Figure S6. Genes Encoding Gremlin and Gdf10 Are Active in qHF-SC and PcG-repressed in aHF-SC, While Genes Encoding Activin B and Follistatin and the Activin Receptor, but Not Activin A, Are Active in Both qHF-SC and aHF-SC. (Related to Figure 7).**

**(A)** ChIP-seq signal tracks are shown for *Grem1* and *Gdf10* genes in chromatin from qHF-SCs, aHF-SCs, and HF-TACs. All tracks are set with the same scale. Note that PcG repression of *Grem1* and *Gdf10* in aHF-SC suggests that their functional significance wanes once HF-SCs are activated. **(B)** ChIP-seq signal tracks of Activin signaling, including *Follistatin* (*Fst*), *Activin B* (*Inhbb*), *Activin A* (*Inhba*), and *Activin receptor* (*Acvr1*) are shown for chromatin isolated from qHF-SCs, aHF-SCs, and HF-TACs. All tracks were set on the same scale. Note that Activin B and its receptors are both expressed in HF-SCs, reflecting cell-autonomous regulation.



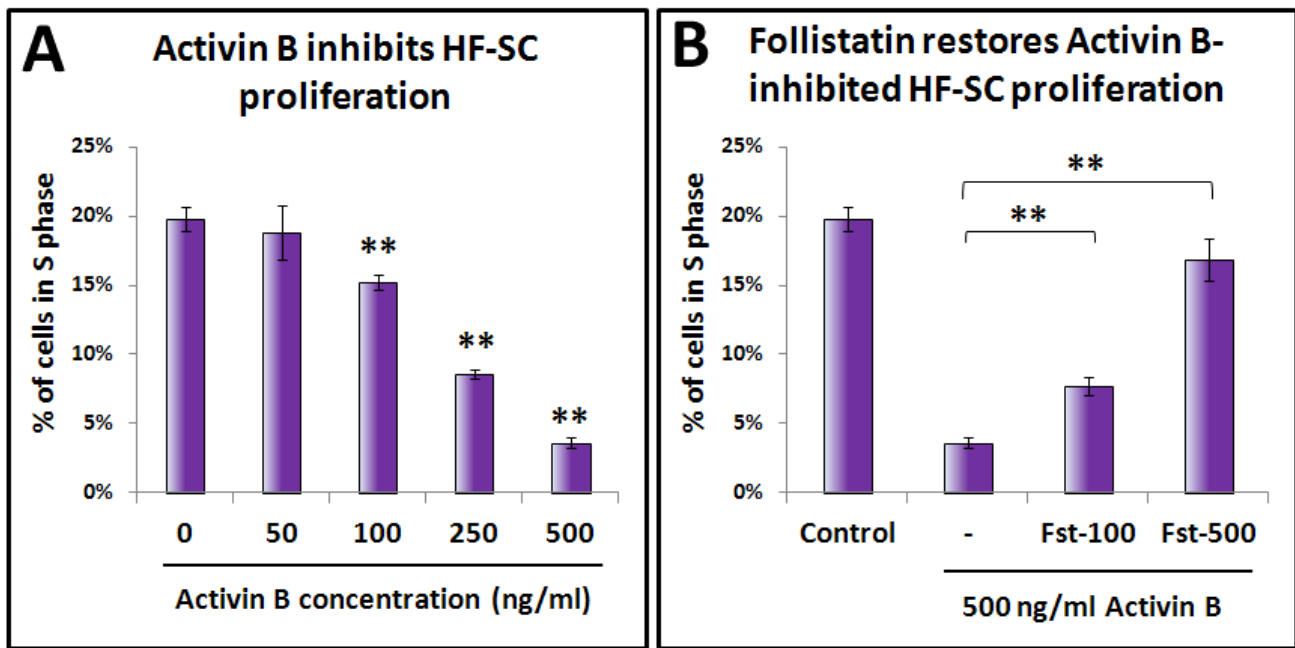

**Figure S7. Activin B Inhibits HF-SC Proliferation While Follistatin Counterbalances This Inhibition (Related to Figure 7).**

(A) Activin B inhibits HF-SC proliferation in a dose-dependent fashion. (B) Follistatin antagonizes Activin B-mediated inhibitory effect in a dose-dependent fashion. HF-SCs were cultured with indicated concentrations of Activin B, and in the presence of 500 ng/ml Activin B, cells were treated with or without 100 (Fst-100) and 500 ng/ml (Fst-500) of Follistatin, respectively. In all graphs, data are reported as average  $\pm$  SD; \*\*,  $p < 0.01$ .

## II. Supplemental Tables (All in supplemental Excel files)

**Table S1** List of signature genes (Related to Figure 1)

**Table S2** Histone marker occupancy (Related to Figure 2)

**Table S3** List of ESC bivalent genes resolved to H3K27me3 in qHF-SCs (Related to Figure 2)

**Table S4** List of (A) Chromatin states of transcription factor families (B) HF-SC signature genes resolved from a bivalent state in ESCs (Related to Figure 3)

**Table S5** List of HF-SC signature genes PcG-repressed (gain of the H3K27me3 mark) in HF-TACs (Related to Figure 4)

**Table S6** List of (A) HF-TAC signature genes induced in HF-TACs from HF-SCs (B) HF-TAC signature genes derepressed in HF-TACs from an H3K27me3 marked state in HF-SCs (Related to Figure 5)

**Table S7** List of (A) HF-SC signature genes PcG-repressed in aHF-SCs and active in qHF-SCs (B) HF-TAC signature genes transcribed at low levels (pre-induced) in aHF-SCs and silent but not PcG-repressed in qHF-SCs (Related to Figure 6). Note that genes e.g. *Nfatc1* and *Fgf18*, are on PcG-repressed list; their role in HF-SC quiescence is established.

## III. Supplemental Experimental Procedures

### Antibody Information

The following antibodies (Abs) were used for ChIP-seq: H3K4me3 (Abcam, ab1012), H3K27me3 (Millipore, 07-449), H3K79me2 (Abcam, ab3594). The following Abs were used for FACS: integrin  $\alpha 6$  (eBiosciences, APC-conjugated, 17-0495; PE-conjugated, 12-0495), CD34 (eBiosciences, Alexa Fluor 647-conjugated, 51-0341; Alexa Fluor 700-conjugated, 56-0341), Sca-1 (eBiosciences, PerCP-

Cy5.5-conjugated, 45-5981), ephrinB1 (R&D Systems, Biotinylated Abs, BAF473), Streptavidin-PE (R&D Systems, F0040).

### **Florescence-Activated Cell Sorting**

To prepare samples for FACS, we incubated 12-15 CD-1 mouse back skins with trypsin at 37°C for 35-45 minutes to detach and generate single cell suspensions of the epidermal and HF cells. FACS purifications of telogen HF-SCs from P52-60 mice and anagen HF-SCs and matrix HF-TACs from P28-30 mice were performed on a FACS Aria system equipped with FACS DiVa software (BD Biosciences). Cells were gated for single events and for viability and then sorted based on surface expression of integrin  $\alpha 6$  and CD34 (telogen bulge SCs), or on the basis of GFP and surface expression of integrin  $\alpha 6$  and CD34 (anagen bulge) or GFP and surface expression of ephrinB1 (HF-TACs) and negatively for Sca-1 to remove upper ORS cells. See Figure 1C for further details. Cells were collected into either Trizol LS reagent (Invitrogen) for RNA purification and microarray analysis, or pre-coated 15-ml Flacon tubes for ChIP-seq.

### **Microarray Analysis**

For each FACS-purified population of HF-cells, mRNAs were purified and provided to the Genomics Core Facility at Memorial Sloan Kettering Institute (MSKI) for quality control, quantification, reverse transcription, labeling and hybridization to MOE430 2.0 microarray chips (Affymetrix). Arrays were then scanned according to the manufacturer's specifications for Affymetrix MOE430 2.0 chips. After subtracting for background, probe signals were normalized using Gene Pattern (Broad Institution). The entire procedure was repeated in duplicate for each sample to produce two independent datasets per mRNA sample. After eliminating probe signals with a value <100 or called absent, signature genes were then selected as remaining probes that were elevated at least two times ( $p < 0.02$ ) in HF-SC populations relative to HF-TACs as follows: a) Common HF-SC signature:  $\geq 2X$  in both telogen and anagen bulge over matrix; b) Quiescent HF-SC signature:  $\geq 2X$  in telogen bulge vs matrix and not shared in the list of anagen bulge vs matrix; c) Active HF-SC signature:  $\geq 2X$  in anagen bulge over

matrix and not shared in the list of anagen bulge vs matrix; d) HF-TA signature:  $\geq 2X$  in matrix over telogen or anagen bulge. These signature genes were hierarchically clustered based on their expression correlation co-efficiencies, and the resulting clusters are shown as a heatmap in Figure 3. Microarray raw data have been submitted to <http://www.ncbi.nlm.nih.gov/geo>.

### **Reverse Transcription and Real-time PCR confirmation**

Total RNAs from FACS-sorted cells described above were purified with the RNeasy Micro Kit (Qiagen) and reverse transcribed (Invitrogen). cDNAs were amplified with primers in SYBR Green quantitative PCR assay on the Applied Biosystems 7900HT Fast Real-Time PCR system. Expression levels were normalized to PCR amplification with primers to GAPDH. Primers were designed using Primer 3 online software to amplify regions spanning ~100-120 nucleotides and encompassing exon/intron boundaries.

### **Cell Culture & Growth Factor Treatment**

HF-SCs were isolated from P52-60 *K14-H2BGFP* mice and cultured and expanded as described (Blanpain et al, 2004). After two passages, SCs were seeded onto 24-well plates with mitomycin C-treated J2 3T3 mouse fibroblast feeders. On day 2 after seeding, SCs were treated with the desired growth factors for 6 days and then EdU-pulsed (10  $\mu$ M) for 1 hour to label S-phase cells prior to harvesting for FACS analysis. Treatment conditions were: Control (PBS/4  $\mu$ M HCl), BMP6 (R&D Systems, 400 ng/ml), Noggin (R&D Systems, 1000 ng/ml), Gremlin (R&D Systems, 500 & 1000 ng/ml), Gdf10 (R&D Systems, 500 & 1000 ng/ml), Activin B (R&D Systems, 50, 100, 250 & 500 ng/ml), Follistatin (R&D Systems, 100 & 500 ng/ml), as indicated. Incorporated EdU was detected using Click-iT EdU Flow Cytometry Assay Kit (Invitrogen). Statistical analyses were determined by the student *t*-test.
